# Supplementary material
Source: PubMed Central journal article supplement (PMC2921222)
Supplement: NIHMS223486-supplement-1_si_001.pdf [file NIHMS223486-supplement-1_si_001.pdf]

Supplemental Information

Enhanced Optical Transmission Mediated by  
Localized Plasmons in Anisotropic, 3D Nanohole  
Arrays

*Jiun-Chan Yang<sup>†</sup>, Hanwei Gao<sup>†</sup>, Jae Yong Suh<sup>†</sup>, Wei Zhou<sup>‡</sup>, Min Hyung Lee<sup>†</sup>, and*

*Teri W. Odom<sup>†‡\*</sup>*

<sup>†</sup> Department of Chemistry, <sup>‡</sup> Department of Materials Science and Engineering

Northwestern University, Evanston, IL 60208, USA

\* To whom correspondence should be addressed. Email: [todom@northwestern.edu](mailto:todom@northwestern.edu)

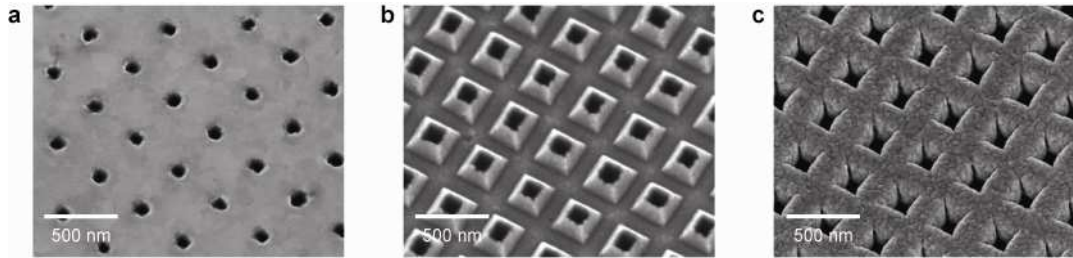

**Figure S1. Surface geometry of three types of hole arrays with 100-nm openings.** (a) Planar, (b) protruding, and (c) recessed hole arrays. The tilt angle of SEM images was  $30^\circ$ . Hole-hole spacing was 400 nm.

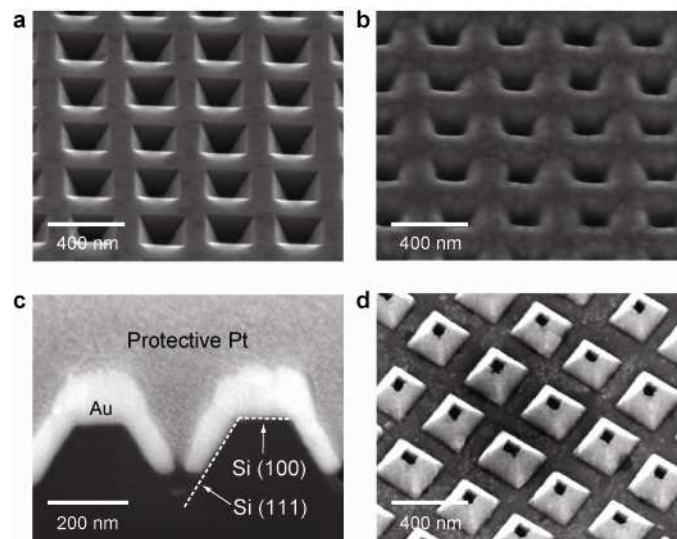

**Figure S2. Surface geometry of protruding hole arrays with 50-nm openings.** (a) Si template fabricated by SIL followed by PEEL (Methods). (b) Si template after depositing Au at  $\alpha = 45^\circ$ , a smaller angle than that in Fig. 1. (c) FIB cross-section of Fig. S2b. (d) 3D protruding hole array with hole size = 50 nm.

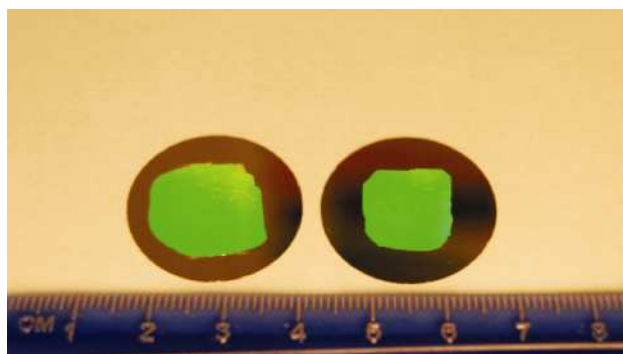

**Figure S3. 3D nanohole arrays with samples areas  $> 1 \text{ cm}^2$ .** The optical photograph of 3D nanohole arrays on glass coverslips.

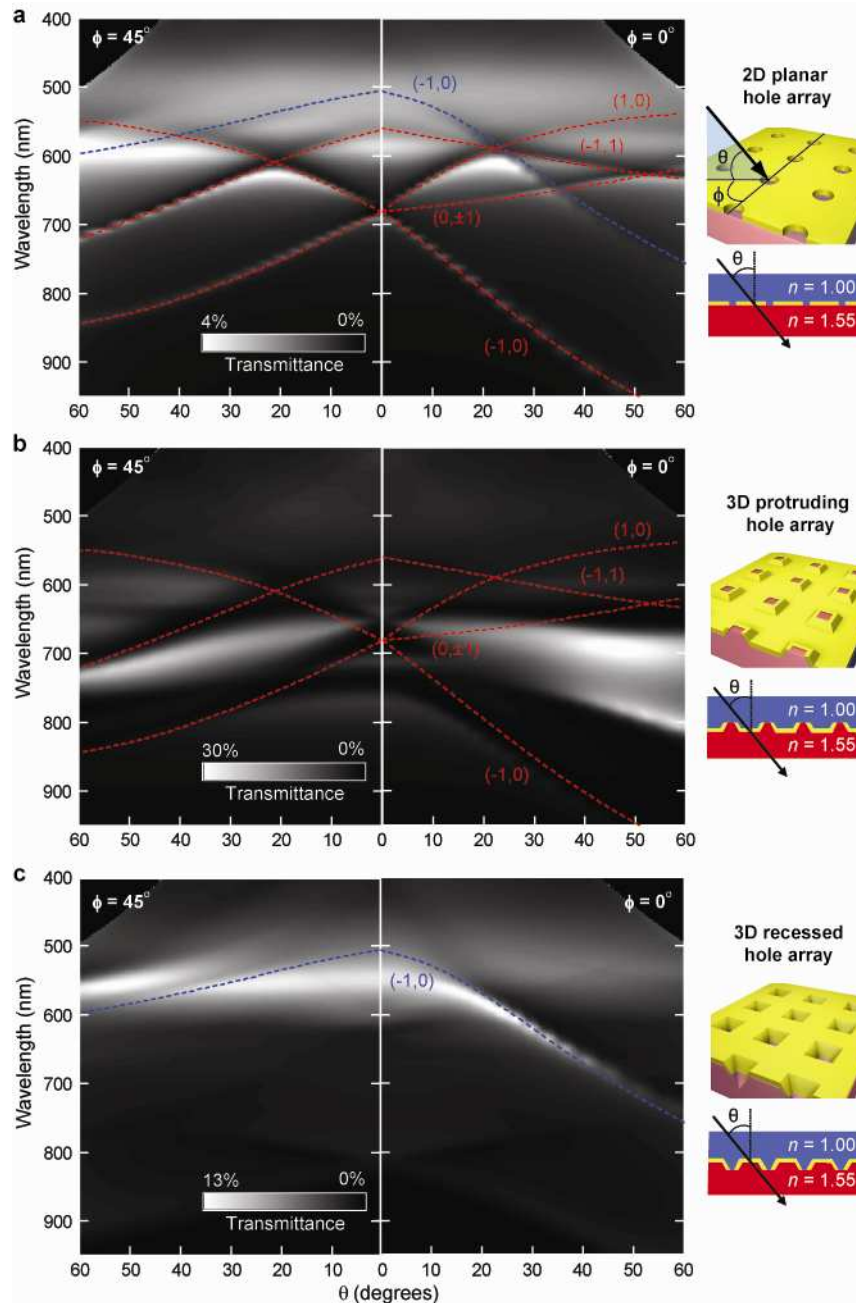

**Figure S4. FDTD calculations confirm LSP-mediated transmission and SPP suppression.** Angle-resolved optical transmission maps of (a) planar, (b) protruding and (c) recessed hole arrays calculated in air under *p*-polarized white light. Blue dashed curves denote SPP modes from the superstrate (air). Red dashed curves show SPP modes from the substrate (PU).  $\theta$  is the incident angle of light, and  $\phi$  is the azimuthal angle. All the important spectral features in Fig. 2 were reproduced by the FDTD calculations.

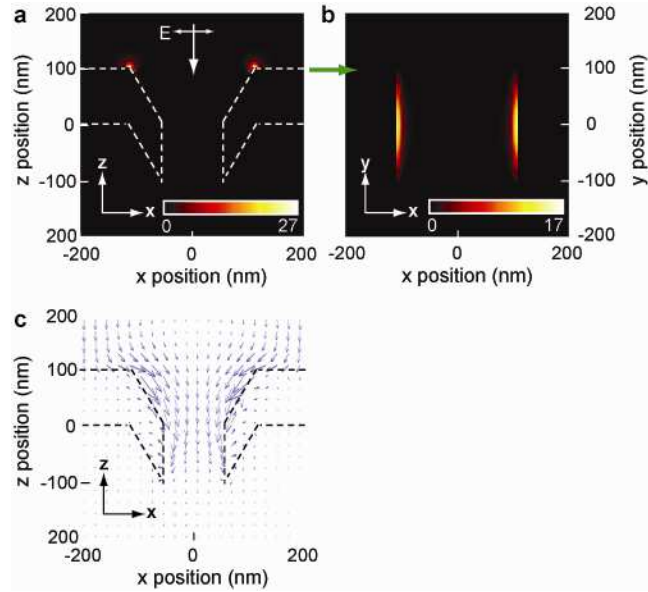

**Figure S5. LSPs excited on 3D recessed hole arrays increase the energy flow inside the hole.** FDTD calculations of  $|E_z|^2$  at  $\lambda = 530$  nm,  $\theta = 0^\circ$ ,  $\phi = 0^\circ$  (**IV** in Fig. 2) from the **(a)** side view and **(b)** top-down view. **(c)** Poynting vector map indicates that the energy flow is directly associated with the high transmission observed at **IV** in Fig. 2. The size of the arrows is proportional to the strength of energy flow.

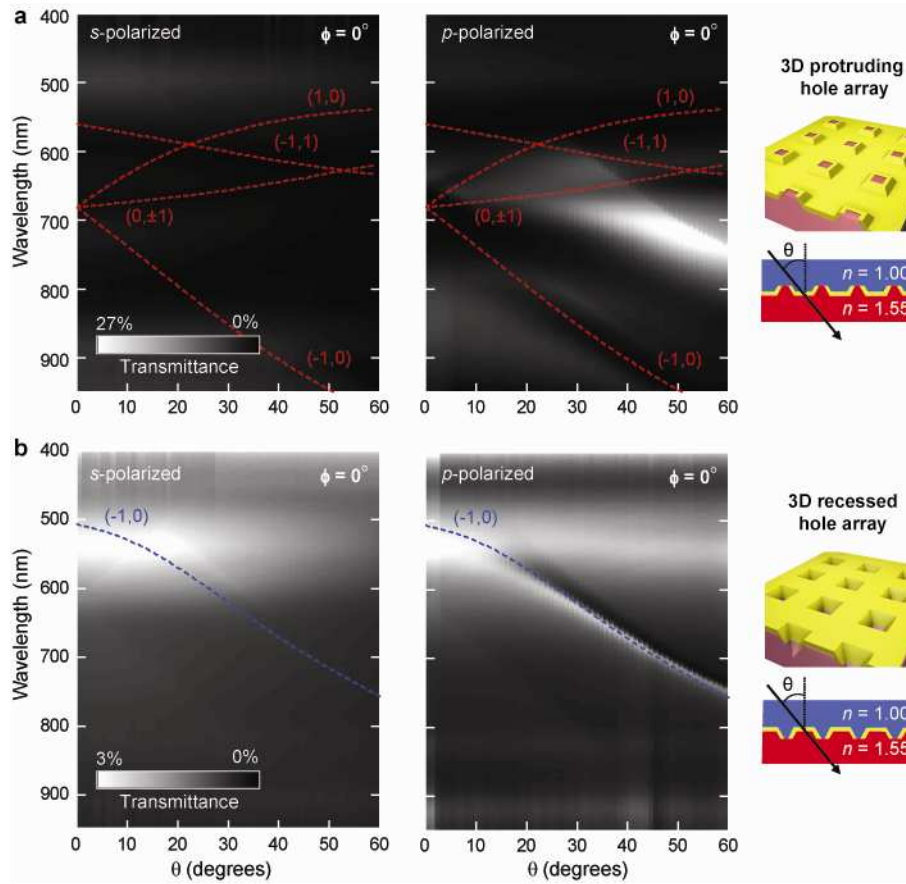

**Figure S6. *s*-polarized light reveals different LSP-mediated optical transmission on 3D hole arrays.** Optical transmission dispersion diagrams of (a) protruding and (b) recessed hole arrays in air under *s*-polarized and *p*-polarized white light. The symbols and curves are the same as those in Fig. 2. LSP-mediated transmission from 3D protruding and 3D recessed hole arrays show different dispersive properties under *s*-polarized light.

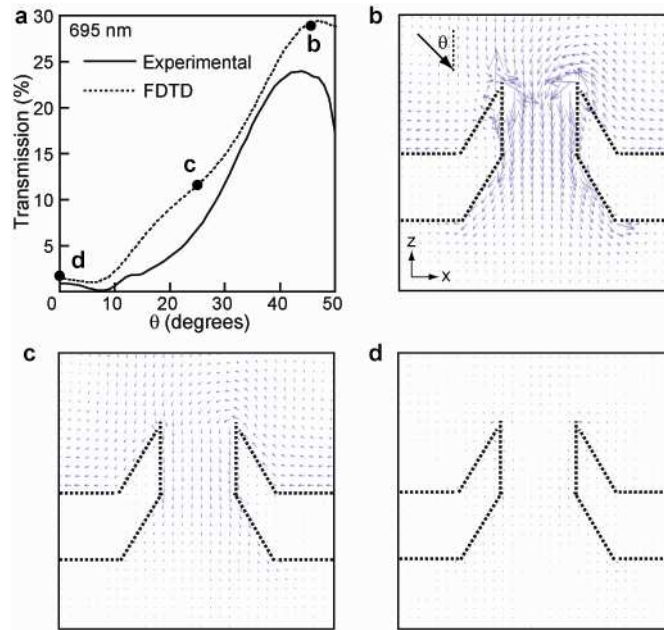

**Figure S7. Localized fields on the edges of a 3D protruding hole under high incident angles increase energy flow inside the hole.** (a) comparison of FDTD calculations and experiment at 695 nm at different angles of excitation. (b)-(d) maps of Poynting vectors on the protruding hole arrays with the excitation angles at  $\theta = 45^\circ$ ,  $25^\circ$ , and  $0^\circ$ . The size of the arrows is proportional to the strength of energy flow.

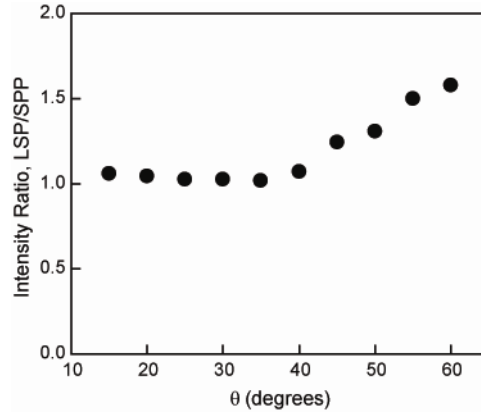

**Figure S8. LSP excitations in 3D recessed hole arrays have higher transmission than SPPs.** The intensity ratio of the LSP peak (around 530 nm) and the SPP (-1, 0) resonance of recessed hole arrays in Fig. 2c indicate that the LSP peak is always of higher intensity than the SPP (-1, 0) peak, especially at  $\theta > 40^\circ$ .
